# Supplementary material for: Experience, corpulence and decision making in ant foraging
Source: Oxford University Press journal article supplement (doi:10.1242/jeb.071076), 2012-07-11
Supplement: jeb071076tables1.pdf [file jeb071076tables1.pdf]

Table S1. Both gaster width and gaster mass are correlated with head width (a proxy for exoskeletal size), so first-order partial correlations between these three intercorrelated variables were calculated to determine the correlation between gaster width and gaster mass when the effect of head width is removed

| First-order partial correlations                             | $r$  | $r^2$ | $t$ | $P$     |
|--------------------------------------------------------------|------|-------|-----|---------|
| Gaster width $\times$ gaster dry mass (excluding head width) | 0.74 | 0.54  | 9.5 | <0.0001 |
| Head width $\times$ gaster width (excluding gaster dry mass) | 0.43 | 0.19  | 4.2 | 0.0001  |
| Head width $\times$ gaster dry mass (excluding gaster width) | 0.10 | 0.01  | 0.9 | 0.37    |

Correlation between head width and gaster width ( $r=0.53$ ,  $N=80$ ,  $P<0.0001$ ).  
Correlation between head width and log-transformed gaster dry mass ( $r=0.35$ ,  $N=80$ ,  $P<0.01$ ).  
The correlation between gaster width and gaster dry mass remains strong and significant even when adjusted to control for the effects of correlation with head width:  $r=0.74$ ,  $N=80$ ,  $P<0.000$ .
